# Supplementary material for: Long-Term Supplementation of Syzygium cumini (L.) Skeels Concentrate Alleviates Age-Related Cognitive Deficit and Oxidative Damage: A Comparative Study of Young vs. Old Mice
Source: MDPI journal article supplement (doi:10.3390/nu15030666), 2023-01-28
Supplement: s1 [file s1]

# Long-term Supplementation of *Syzygium cumini* (L.) Skeels Concentrate Alleviates Age-related Cognitive Deficit and Oxidative Damage: A Comparative Study of Young vs Old Mice

Nosheen Malik <sup>1</sup>, Sana Javaid <sup>1,2</sup>, Waseem Ashraf <sup>1</sup>, Farhan Siddique <sup>3</sup>, Muhammad Fawad Rasool <sup>4</sup>, Faleh Alqahtani <sup>5,\*</sup>, Tanveer Ahmad <sup>6</sup>, Muhammad Asad Abrar <sup>7</sup> and Imran Imran <sup>1,\*</sup>

## Supplementary Materials

**Supplementary Table S1.** Physiochemical properties, 2D (Chemdraw) and 3D (Chemdraw 3D), and chemical descriptors of investigated compounds A–E.

| Compound Name            | 2D Structure | Chemical Properties                                                                                                                                                                                                                                                                                                                                                              | Chemical Analysis                                                                                                                                                                                    | 3D Structure                                                                          |
|--------------------------|--------------|----------------------------------------------------------------------------------------------------------------------------------------------------------------------------------------------------------------------------------------------------------------------------------------------------------------------------------------------------------------------------------|------------------------------------------------------------------------------------------------------------------------------------------------------------------------------------------------------|---------------------------------------------------------------------------------------|
| Caryophyllene (A)        |              | Boiling Point: 576.5 [K]<br>Melting Point: 323.21 [K]<br>Critical Temp: 737.59 [K]<br>Critical Pres: 20.27 [Bar]<br>Critical Vol: 716.5 [cm <sup>3</sup> /mol]<br>Gibbs Energy: 196.63 [kJ/mol]<br>Log P: 4.48<br>MR: 67.73 [cm <sup>3</sup> /mol]<br>Henry's Law: -1.45<br>Heat of Form: -112.68 [kJ/mol]<br>tPSA: 0<br>CLogP: 6.453<br>CMR: 6.6238<br>LogS: -4.156<br>nKa: N/A | Chemical Formula: C <sub>15</sub> H <sub>24</sub><br>Exact Mass: 204.19<br>Molecular Weight: 204.36<br>m/z: 204.19 (100.0%), 205.19 (16.5%), 206.19 (1.2%)<br>Elemental Analysis: C, 88.16; H, 11.84 | 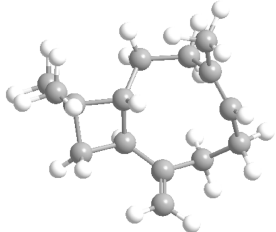  |
| Humulene (B)             |              | Boiling Point: 586.4 [K]<br>Melting Point: 299.71 [K]<br>Critical Temp: 755.3 [K]<br>Critical Pres: 20.53 [Bar]<br>Critical Vol: 722.5 [cm <sup>3</sup> /mol]<br>Gibbs Energy: 137.25 [kJ/mol]<br>Log P: 4.83<br>MR: 71.02 [cm <sup>3</sup> /mol]<br>Henry's Law: -1.75<br>Heat of Form: -125.84 [kJ/mol]<br>tPSA: 0<br>CLogP: 6.773<br>CMR: 6.7758<br>LogS: -4.195<br>nKa: N/A  | Chemical Formula: C <sub>15</sub> H <sub>24</sub><br>Exact Mass: 204.19<br>Molecular Weight: 204.36<br>m/z: 204.19 (100.0%), 205.19 (16.5%), 206.19 (1.2%)<br>Elemental Analysis: C, 88.16; H, 11.84 |  |
| (E)-.beta.-Farnesene (C) |              | Boiling Point: 547.44 [K]<br>Melting Point: 204.51 [K]<br>Critical Temp: 705.83 [K]<br>Critical Pres: 16.04 [Bar]<br>Critical Vol: 819.5 [cm <sup>3</sup> /mol]<br>Gibbs Energy: 298.05 [kJ/mol]<br>Log P: 5.13<br>MR: 72.95 [cm <sup>3</sup> /mol]<br>Henry's Law: -1.12<br>Heat of Form: -22.43 [kJ/mol]<br>tPSA: 0<br>CLogP: 6.787<br>CMR: 7.0582<br>LogS: -3.608<br>nKa: N/A | Chemical Formula: C <sub>15</sub> H <sub>26</sub><br>Exact Mass: 206.20<br>Molecular Weight: 206.37<br>m/z: 206.20 (100.0%), 207.21 (16.5%), 208.21 (1.3%)<br>Elemental Analysis: C, 87.30; H, 12.70 |  |

|               |                                                                                   |                                                                                                                                                                                                                                                                                                                                                                                             |                                                                                                                                                                                                                      |                                                                                     |
|---------------|-----------------------------------------------------------------------------------|---------------------------------------------------------------------------------------------------------------------------------------------------------------------------------------------------------------------------------------------------------------------------------------------------------------------------------------------------------------------------------------------|----------------------------------------------------------------------------------------------------------------------------------------------------------------------------------------------------------------------|-------------------------------------------------------------------------------------|
| Phytol (D)    | 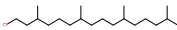 | Boiling Point: 752.1 [K]<br>Melting Point: 311.44 [K]<br>Critical Temp: 777.23 [K]<br>Critical Pres: 11.37 [Bar]<br>Critical Vol: 1137.5 [cm <sup>3</sup> /mol]<br>Gibbs Energy: 45.05 [kJ/mol]<br>Log P: 6.96<br>MR: 97.17 [cm <sup>3</sup> /mol]<br>Henry's Law: 1.6<br>Heat of Form: -516.77 [kJ/mol]<br>tPSA: 20.23<br>CLogP: 8.483<br>CMR: 9.5811<br>LogS: -5.139<br>nKa: 14 594       | Chemical Formula: C <sub>20</sub> H <sub>42</sub> O<br>Exact Mass: 298.32<br>Molecular Weight: 298.56<br>m/z: 298.32 (100.0%), 299.33 (22.2%), 300.33 (2.5%)<br>Elemental Analysis: C, 80.46; H, 14.18; O, 5.36      |  |
| Donepezil (E) |  | Boiling Point: 964.14 [K]<br>Melting Point: 624.13 [K]<br>Critical Temp: 952.21 [K]<br>Critical Pres: 14.84 [Bar]<br>Critical Vol: 1122.5 [cm <sup>3</sup> /mol]<br>Gibbs Energy: 222.62 [kJ/mol]<br>Log P: 4.01<br>MR: 113.97 [cm <sup>3</sup> /mol]<br>Henry's Law: 10.3<br>Heat of Form: -301.37 [kJ/mol]<br>tPSA: 38.77<br>CLogP: 4.59759<br>CMR: 11.1212<br>LogS: -4.609<br>nKa: 9 287 | Chemical Formula: C <sub>24</sub> H <sub>29</sub> NO <sub>3</sub><br>Exact Mass: 379.21<br>Molecular Weight: 379.50<br>m/z: 379.21 (100.0%), 380.22 (26.4%), 381.2<br>Elemental Analysis: C, 75.96; H, 7.70; N, 3.69 |  |

K: kelvin, cm<sup>3</sup>/mol: centimeter cube in one mole, kJ/mol: kilojoules in one mole.

**Supplementary Table S2.** Adsorption, Distribution, Metabolism, Excretion and Toxicological properties of the investigated compounds (A–D) in comparison to donepezil (E) drug.

| ADMET                                                | A                               | B                               | C                               | D                                 | Donepezil (E)                                   |
|------------------------------------------------------|---------------------------------|---------------------------------|---------------------------------|-----------------------------------|-------------------------------------------------|
| <b>Physiochemical Properties</b>                     |                                 |                                 |                                 |                                   |                                                 |
| Formula                                              | C <sub>15</sub> H <sub>24</sub> | C <sub>15</sub> H <sub>24</sub> | C <sub>15</sub> H <sub>26</sub> | C <sub>20</sub> H <sub>40</sub> O | C <sub>24</sub> H <sub>29</sub> NO <sub>3</sub> |
| Molecular Weight                                     | 204.35                          | 204.35                          | 206.37                          | 296.53                            | 379.49                                          |
| No.of Heavy Atoms                                    | 15                              | 15                              | 15                              | 21                                | 28                                              |
| No.arom.Heavy Atoms                                  | 0                               | 0                               | 0                               | 0                                 | 12                                              |
| Fraction Csp <sup>3</sup>                            | 0.73                            | 0.6                             | 0.6                             | 0.9                               | 0.46                                            |
| No. of rotatable bonds                               | 0                               | 0                               | 7                               | 13                                | 6                                               |
| No.of H.bond Acceptor                                | 0                               | 0                               | 0                               | 0                                 | 4                                               |
| No. of H.bod donors                                  | 0                               | 0                               | 0                               | 0                                 | 0                                               |
| Molar Refractivity                                   | 68.78                           | 70.42                           | 72.8                            | 98.94                             | 115.31                                          |
| Topological polar surface Area (TPSA) A <sup>2</sup> | 0                               | 0                               | 0                               | 20.23                             | 38.77                                           |
| <b>Lipophilicity (Log P<sub>o/w</sub>)</b>           |                                 |                                 |                                 |                                   |                                                 |
| iLOGP                                                | 3.29                            | 3.3                             | 4.02                            | 4.71                              | 3.92                                            |
| XLOGP3                                               | 4.38                            | 4.79                            | 6.21                            | 8.19                              | 4.28                                            |
| WLOGP                                                | 4.73                            | 5.04                            | 5.43                            | 6.36                              | 3.83                                            |
| MLOGP                                                | 4.63                            | 4.53                            | 4.93                            | 5.25                              | 3.06                                            |
| Silicos-IT Log P                                     | 4.19                            | 4.19                            | 4.94                            | 6.57                              | 4.91                                            |
| Consensus Log P (average of all above predictions)   | 4.24                            | 4.37                            | 5.1                             | 6.22                              | 4                                               |
| <b>Water Solubility</b>                              |                                 |                                 |                                 |                                   |                                                 |
| Log S (ESOL)                                         | −3.87                           | −4.12                           | −4.57                           | −5.98                             | −4.81                                           |
| Solubility (mg/ml)                                   | 2.78E-02                        | 1.53E-02                        | 5.56E-03                        | 3.10E-04                          | 5.87E-03                                        |
| Class                                                | Soluble                         | Moderately soluble              | Moderately soluble              | Moderately soluble                | Moderately soluble                              |
| Log S (Ali)                                          | −4.1                            | −4.52                           | −6                              | −8.47                             | −4.81                                           |
| Solubility (mg/ml)                                   | 1.64E-02                        | 6.15E-03                        | 2.09E-04                        | 9.94E-07                          | 5.92E-03                                        |
| Class                                                | Moderately soluble              | Moderately soluble              | Moderately soluble              | Poorly soluble                    | Moderately soluble                              |
| Log S (SILICOS-IT)                                   | −3.77                           | −3.77                           | −4.08                           | −5.51                             | −6.9                                            |
| Solubility (mg/ml)                                   | 3.49E-02                        | 3.49E-02                        | 1.70E-02                        | 9.06E-04                          | 4.78E-05                                        |
| Class                                                | Soluble                         | Soluble                         | Moderately soluble              | Moderately soluble                | Poorly soluble                                  |
| <b>Pharmacokinetics</b>                              |                                 |                                 |                                 |                                   |                                                 |
| GI absorption                                        | medium                          | medium                          | Low                             | Low                               | High                                            |
| BBB permeant                                         | No                              | No                              | No                              | No                                | Yes                                             |
| P-gp substrate                                       | No                              | No                              | No                              | Yes                               | Yes                                             |
| CYP1A2 inhibitor                                     | No                              | No                              | Yes                             | No                                | No                                              |
| CYP2C19 inhibitor                                    | Yes                             | No                              | No                              | No                                | No                                              |
| CYP2C9 inhibitor                                     | Yes                             | Yes                             | Yes                             | Yes                               | No                                              |
| CYP2D6 inhibitor                                     | No                              | No                              | No                              | No                                | Yes                                             |
| CYP3A4 inhibitor                                     | No                              | No                              | No                              | No                                | Yes                                             |
| Log Kp (skin permeation) cm/s                        | −4.44                           | −4.15                           | −3.15                           | −2.29                             | −5.58                                           |
| <b>Drug Likeness</b>                                 |                                 |                                 |                                 |                                   |                                                 |
| Lipinski Violation                                   | 1                               | 1                               | 1                               | 1                                 | 0                                               |
| Ghose Violation                                      | 0                               | 0                               | 0                               | 1                                 | 0                                               |
| Veber Violation                                      | 0                               | 0                               | 0                               | 1                                 | 0                                               |
| Egan Violation                                       | 0                               | 0                               | 0                               | 1                                 | 0                                               |
| Muegge Violation                                     | 1                               | 1                               | 2                               | 2                                 | 0                                               |
| Bioavailability                                      | 0.55                            | 0.55                            | 0.55                            | 0.55                              | 0.55                                            |
| <b>Medicinal Chemistry</b>                           |                                 |                                 |                                 |                                   |                                                 |

|                                          |      |      |      |     |      |
|------------------------------------------|------|------|------|-----|------|
| Pan Assay Interference Structure (PAINS) | 0    | 0    | 0    | 0   | 0    |
| Brenk                                    | 1    | 1    | 1    | 1   | 0    |
| Leadlikeness                             | 2    | 2    | 2    | 2   | 2    |
| Synthetic Accessibility                  | 4.51 | 3.78 | 3.18 | 4.3 | 3.36 |

XLOGP3: pure atom-additive model, LOGP: octanol-water partition coefficient, Log S: water solubility of a drug,

CYP: Cytochrome P450, Log Kp: Skin permeability.
